# Supplementary material for: Molecular therapies for systemic lupus erythematosus: clinical trials and future prospects
Source: Springer Nature journal article supplement (doi:10.1186/ar2711), 2009-01-01
Supplement: Additional file 1 [file ar2711-s1.doc]

| Compounds | Product description | Type of study | Results/comments | Ref |
| --- | --- | --- | --- | --- |
| Atacicept | Fusion protein  (TACI-Ig)  Blys inhibition | **Phase Ib**, double-blind, placebo controlled, dose-escalating trial. Patients with mild to moderate SLE were enrolled. | Dose-dependent reduction in Ig levels and B cell numbers. Well tolerated. | 3 |
| 15-deoxyspergualin (DSG) or  Gusperimus | Binds to HSC70/hsp73 | **Case report:** 3 SLE patients, safety evaluation. Treatment was performed by 9 cycles (1 cycle = 15-DSG administration for 14 days with a break of 7 days). | 15-DSG was well tolerated but 2/3 patients had non-severe infectious episodes. | 5 |
| FK506 or Tacrolimus | Inhibition of calcineurin | **Retroprospective review**: analysis of 5 studies (only one randomized controlled trial), including a total of 60 SLE patients with cutaneous lesions. | Efficacy in cutaneous lesions of SLE, but weaker efficacy in subacute cutaneous LE or in discoid LE. Studies involving only a small number of patients and no control group. | 7 |
| Rapamycin/Sirolimus/  Rapamune | mTOR inactivation | **Open label study** : 9 SLE patients treated unsuccessfully with immunosuppressive medications. Rapamycin was given orally (2mg/day). | Reduction of BILAG score, of SLEDAI score and of prednisolone use compared with pre-rapamycin treatment. | 8 |
| Celecoxib or Celebrex | COX-2 inhibition | -**Retrospective review** of medical records for 50 patients treated with celecoxib  -**Prospective trial** including 51 patients. | Diminution of inflammation and good safety profile.  Reduction of SLEDAI and no increase of coagulability. | 10  11 |
| Pentoxiphylline (PTX) | Xanthine derivative  PDE inhibitor | **Open label study** : 11 SLE patients with refractory nephritis: class III, IV or V, proteinuria ≥ 3g/24h. | Decrease of proteinuria (from 5.5 to 2.0, p=0.003). No patients discontinued the study due to side effects. | 13 |

**Expanded Table 1: Compounds of interest as new tools for the treatment of systemic lupus erythematosus**

| Tamoxifen | Estrogen antagonist | **Double-blind cross-over trial**: 11 female with stable SLE. | No improvement of disease activity and 2 patients deteriorated. | 18 |
| --- | --- | --- | --- | --- |
| DHEA or Prasterone | Androgen | **Review**: analysis of randomized controlled trials (7) comparing DHEA to a placebo in SLE patients (842 participants). | -Little clinical effect on disease activity for patients with moderate disease.  -Modest but significant improvement in health related quality of life.  -Greater number of participants experiencing adverse events. | 20 |
| Fulvestrant or Faslodex | Estrogen receptor down regulator | **Double-blind placebo controlled** : 20 premenopausal SLE women with moderate SLEDAI received either 250 mg fulvestran intramuscularly for 12 months (10) or placebo (10). | Improvement of SLEDAI but not of serological markers, routine laboratory tests nor bone density. Medications for lupus was reduced in the fulvestrant group. | 21 |
| Bromocriptine (BRC) | Dopamine agonist  inhibition of prolactine secretion | **-Open label trial :** 7 active SLE patients treated daily during 6 to 9 months.  **-Double-blind, randomized, placebo controlled:** 66 SLE patients(36 BRC, 30 placebo), treated daily and followed for 2-17 months. | Serum prolactine and anti-dsDNA suppressed, SLEDAI decreased (16 to 5.9).  Significant decreased of SLEDAI score (0.9 *vs.* 2.6 in the control group), decreased of the mean number of flares/patient/month (0.08 *vs.* 0.18 in the control group). | 24  25 |
| LJP394/Abetimus sodium/Riquent  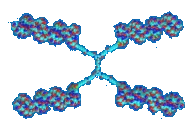 | Toleragen molecule;  4 strands of ds-oligonucleotides (20-mer) linked through a triethylene glycol based platform | **Phase III, randomized, placebo controlled trial:** 317 SLE patients with a history of renal flares and anti-dsDNA levels >15IU/ml.Patients received 100mg/week for up to 22 months. | Abetimus did not prolong time i) to renal flare, ii) to initiation of high-dose corticosteroid and/or cyclophosphamide treatment, or iii) to major SLE flare, but decreased anti-dsDNA Ab levels (p<0.0001). | 27 |
| Lupuzor  RIHMVYSKR**S**GKPRGYAFIEY | 21-mer peptide P140 (phosphoserine at position 140) | **Phase IIa:** open label, dose escalating trial.20 patients with moderate SLE were enrolled. Lupuzor was given sc (200µg or 1mg). | Diminution of anti-dsDNA Ab levels and of SLEDAI score in the group that received 200µg of peptide. | 31 |
